# Supplementary material
Source: ML conference proceedings conference paper supplement (https://proceedings.neurips.cc/paper_files/paper/2022/hash/509f7977030f3550300f541ec228c3fc-Abstract.html)
Supplement: Supplementary file 1 [file 509f7977030f3550300f541ec228c3fc-Supplemental-Conference.zip]

Archive with 2 entries (2 files):
- CNF_NIPS_Camera__Ready_final_v4_app.pdf
- __MACOSX/._CNF_NIPS_Camera__Ready_final_v4_app.pdf
